# Supplementary material for: Facet-dependent electrical conductivity properties of a 4H-SiC wafer
Source: Royal Society of Chemistry journal article supplement (doi:10.1039/d2tc01981g), 2022-01-01
Supplement: d2tc01981g1.pdf [file d2tc01981g1.pdf]

Electronic Supplementary Information

**Facet-dependent electrical conductivity properties of 4H-SiC wafer**

Gautam Kumar, Jing-Wei Chen, Hsueh-Heng Ma, Xing-Fu Huang and Michael H. Huang\*

*Department of Chemistry and Frontier Research Center on Fundamental and Applied Sciences of Matters, National Tsing Hua University, Hsinchu 300044, Taiwan*

**Probe preparation**

The tungsten probes were fabricated from 99.95% tungsten wires with a diameter of 0.5 mm (Strem Chemical). The tungsten wires were straightened and cut into pieces. Next, the wires were dipped into a 2.0 M NaOH electrolyte solution and a current of 1 A at a voltage of 15 V was applied to sharpen the tips. The tips should be sequentially immersed into a 10 M KOH solution and deionized water for 3 sec each. This procedure could remove the surface tungsten oxide layer and any ions from the tip surface. The tip diameter is 100–200 nm.

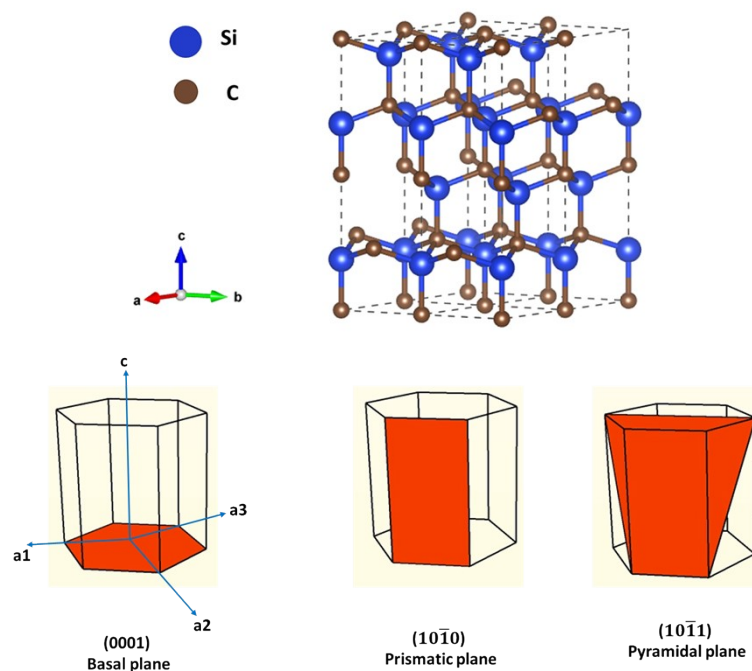

**Fig. S1** Wurtzite crystal structure of 4H-SiC and its different planes.

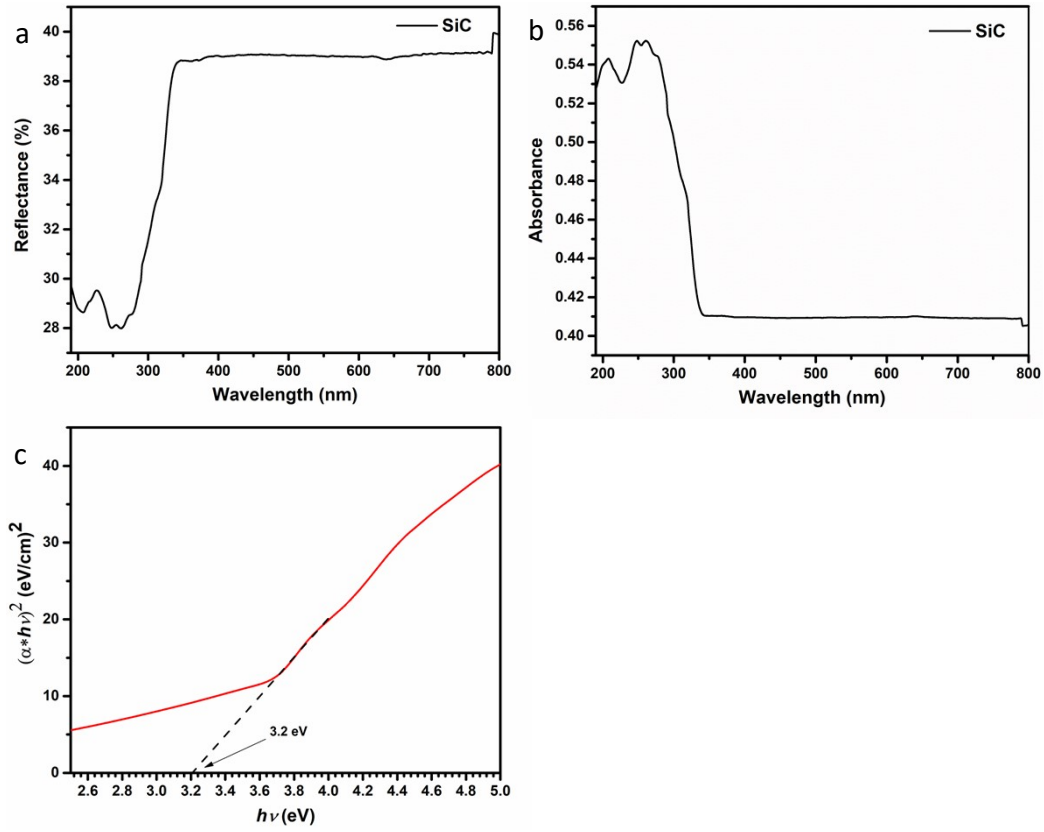

**Fig. S2** (a, b) Diffuse reflectance spectrum and the converted absorption spectrum of 4H-SiC wafer. (c) Tauc plot for the determination of SiC band gap.

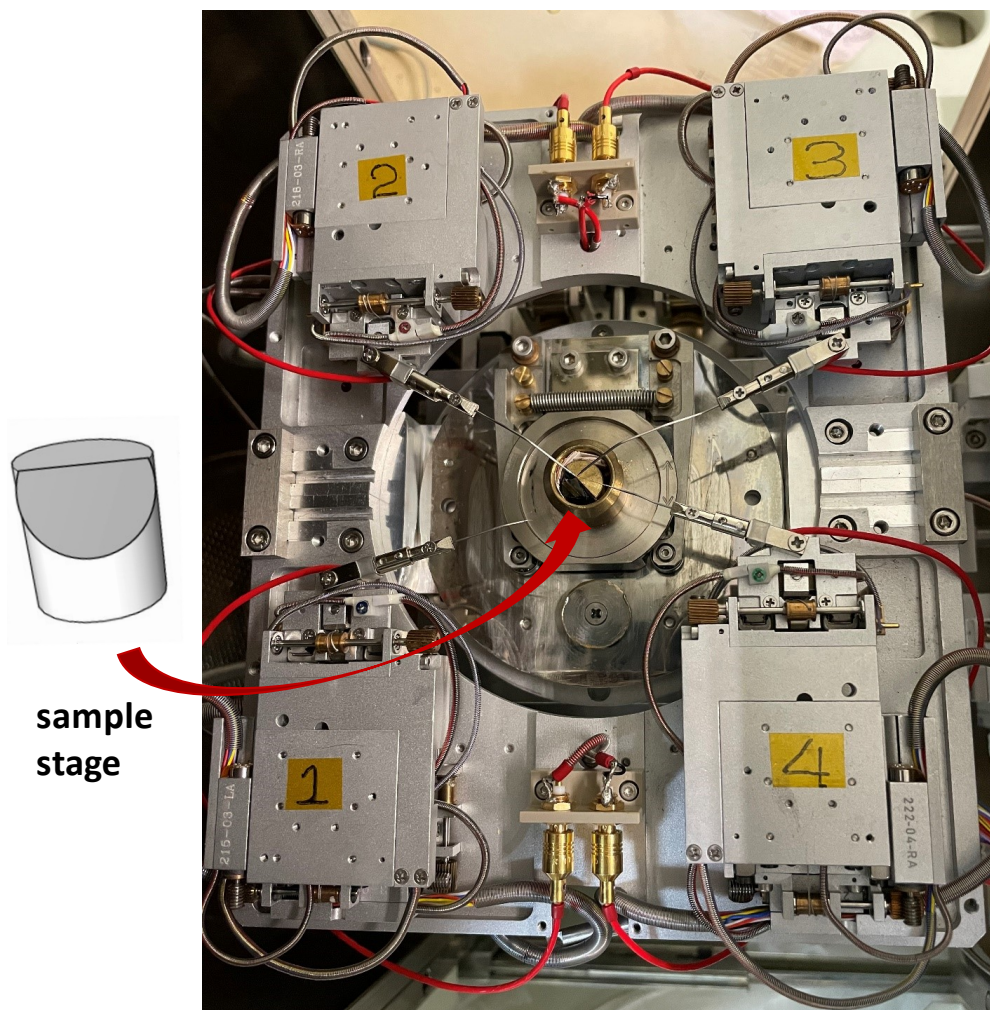

**Fig. S3** Photograph of the nanomanipulator and a drawing of the sample stage showing the slanted side.

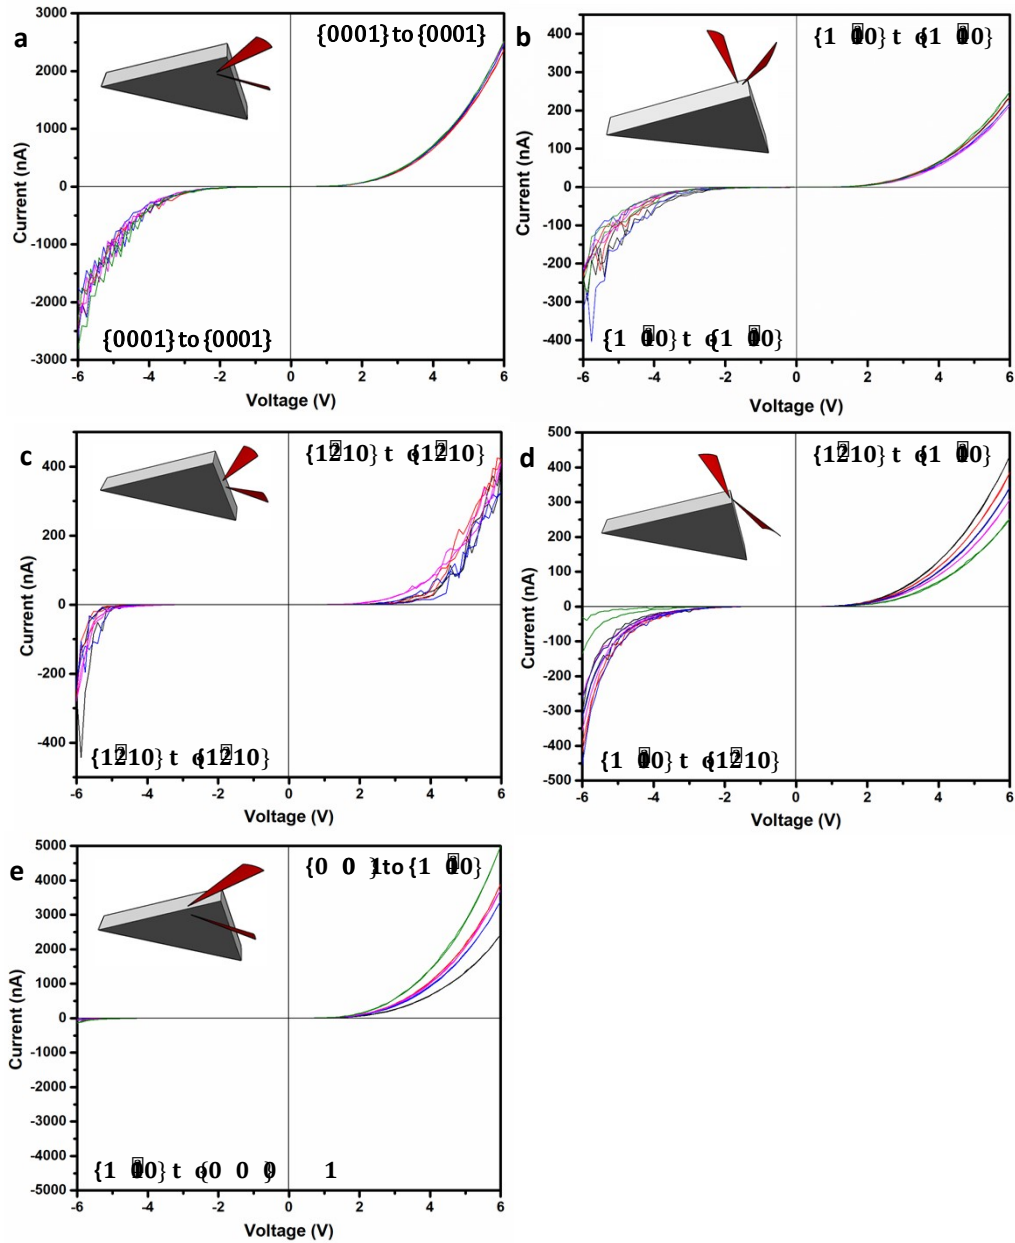

**Fig. S4** (a–e) Multiple  $I-V$  curves for different probe contact combinations on a 4H-SiC wafer.

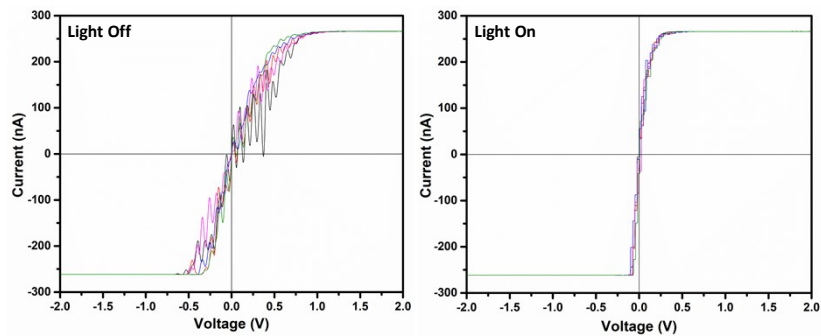

**Fig. S5** Multiple  $I$ - $V$  curves obtained using a conductive AFM probe on a 4H-SiC wafer with and without LED light illumination.
